# Supplementary material
Source: publisher figshare collection journal article supplement (https://tandf.figshare.com/ndownloader/files/22076688)

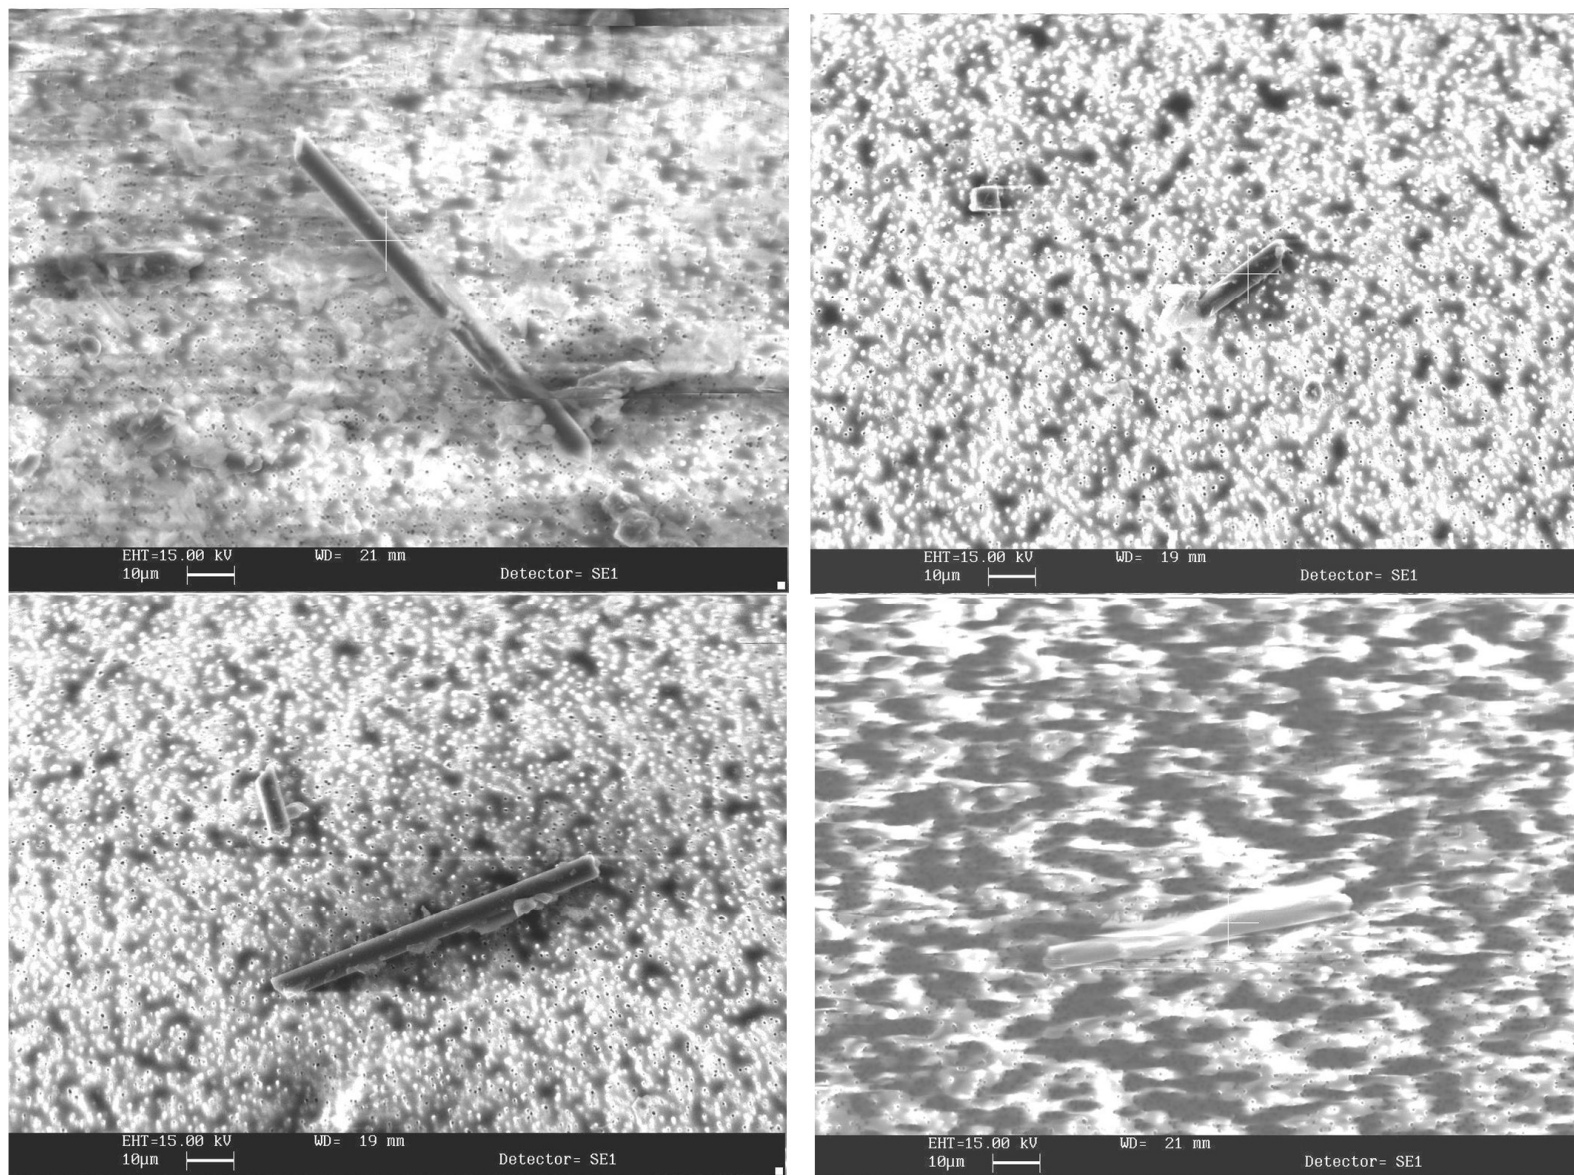

Figure 1: CFR images obtained from environmental samplings and analyzed by SEM.

Supplement: Supplementary file 1 [file 22076688]
